# Supplementary material
Source: PubMed Central journal article supplement (PMC314195)

**NBD2**

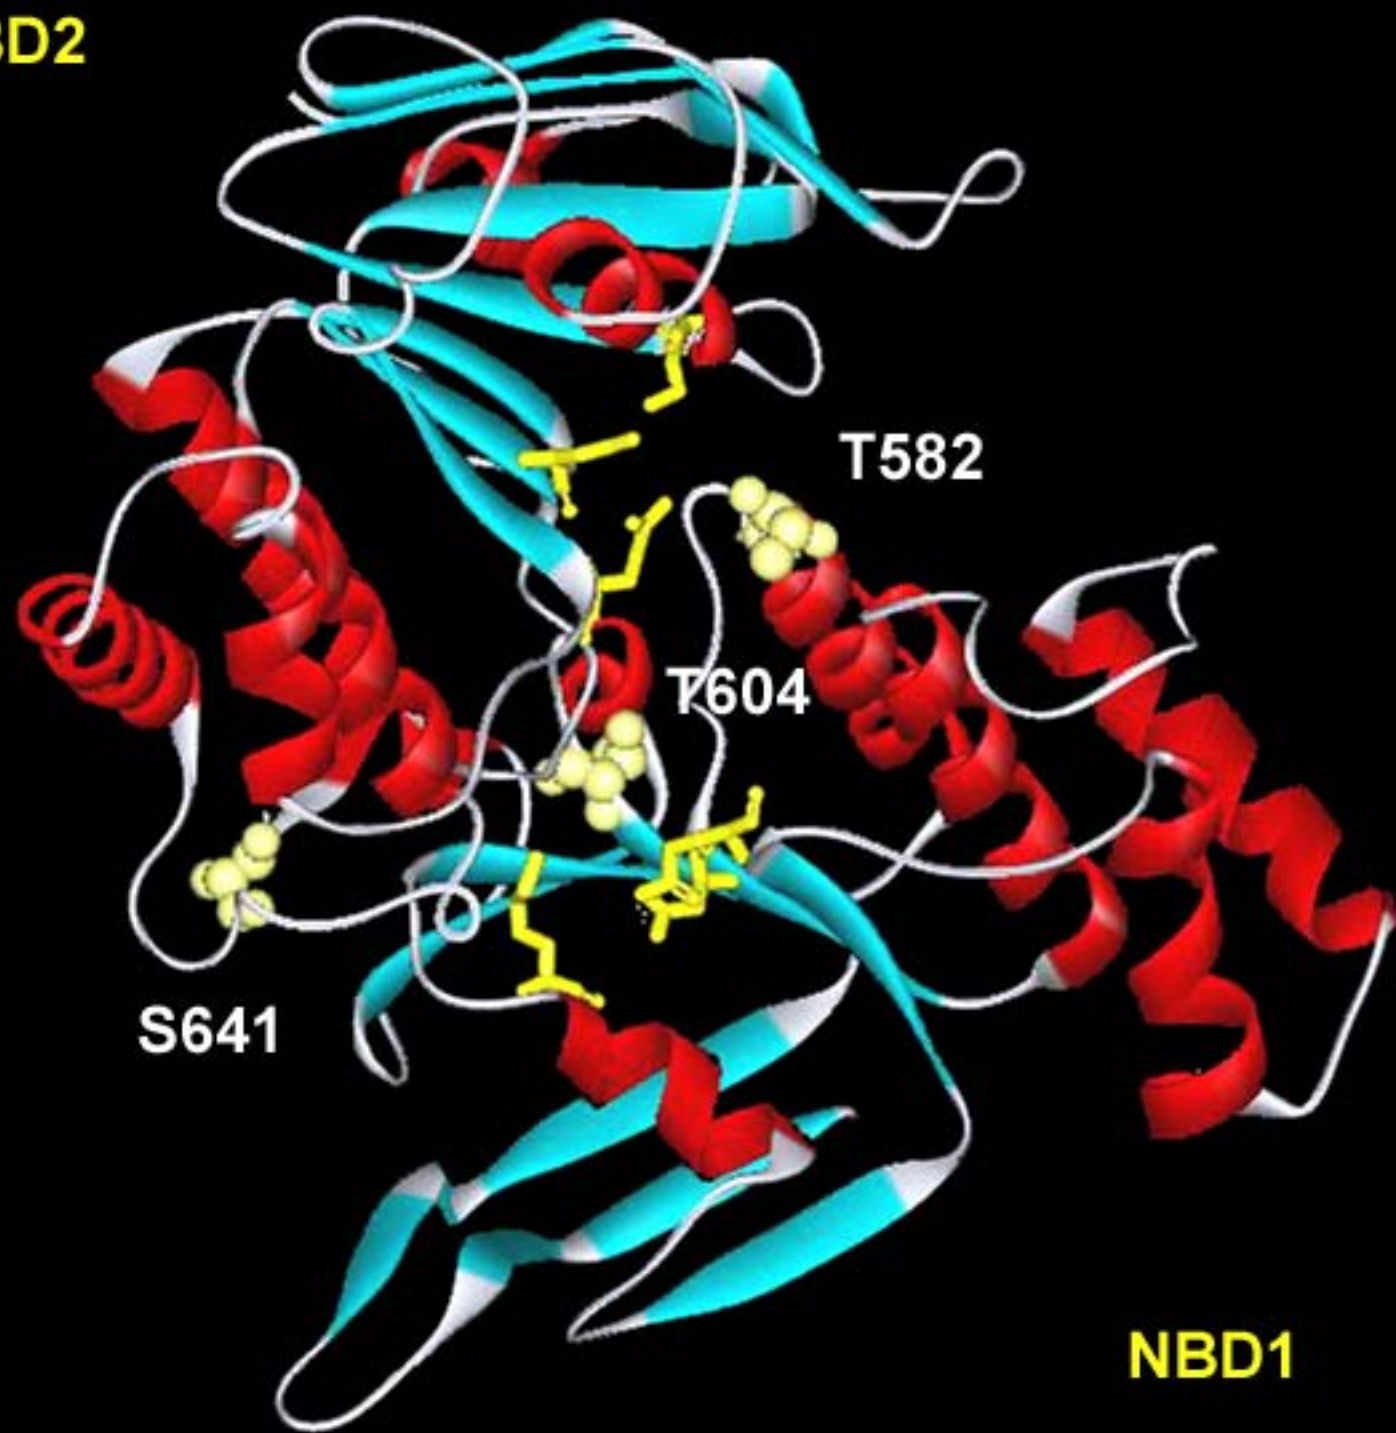

**T582**

**T604**

**S641**

**NBD1**

Supplement: pnas_101_1_390__2.pdf [file pnas_101_1_390__2.pdf]
